# Supplementary material for: Smurf1 promotes gastric cancer growth and metastasis by regulating Axin2- dependent Wnt/β-catenin signaling
Source: Research Square preprint supplement (doi:10.21203/rs.3.rs-6694191/v1), 2025-06-27

Figure 4B

Western blot analysis of Axin1 and Axin2 protein levels in AGS cells after Smurf1 overexpression.

Axin1

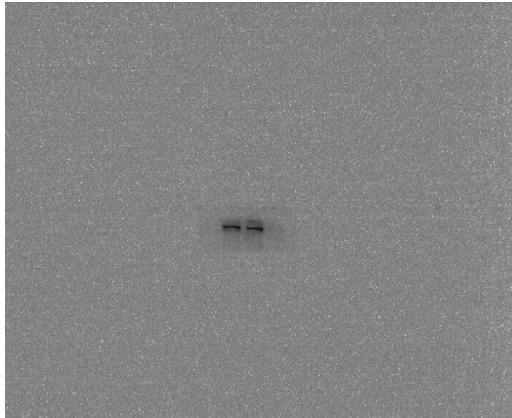

Axin2

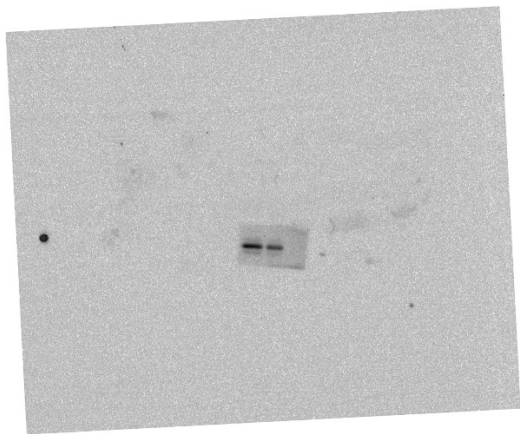

$\beta$ -actin

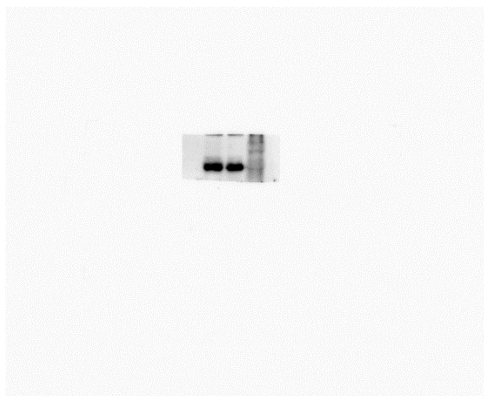

Figure 4C

Co-IP assay of the direct combination of Smurf1 with Axin2 in AGS cells using the Smurf1 antibody, followed by western blot analysis using the Axin2 antibody.

Axin2

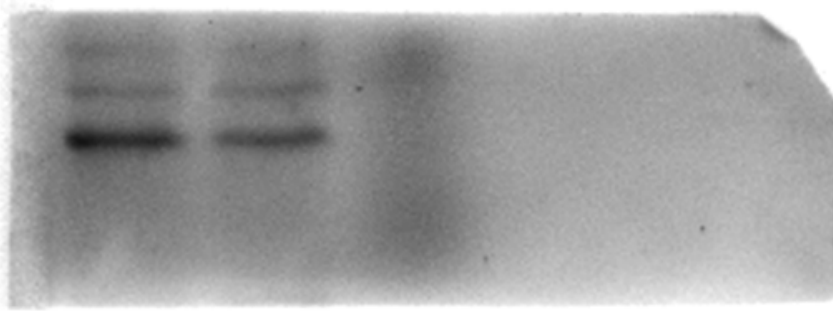

Smurf1

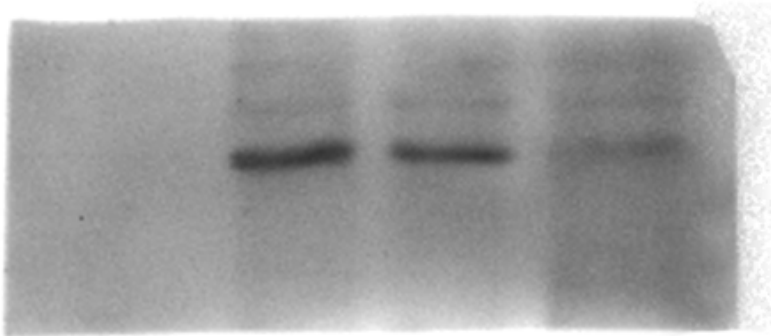

Figure 4D

After Smurf1 overexpression, de novo protein synthesis was inhibited in AGS cells using 40  $\mu$ M of Chx, and then Axin2 protein levels were measured using western blot assays at different time points.

Axin2

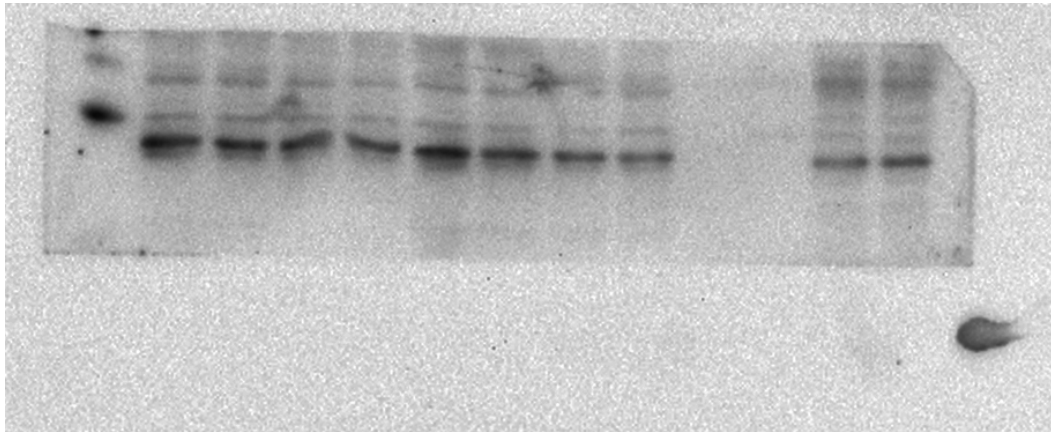

$\beta$ -actin

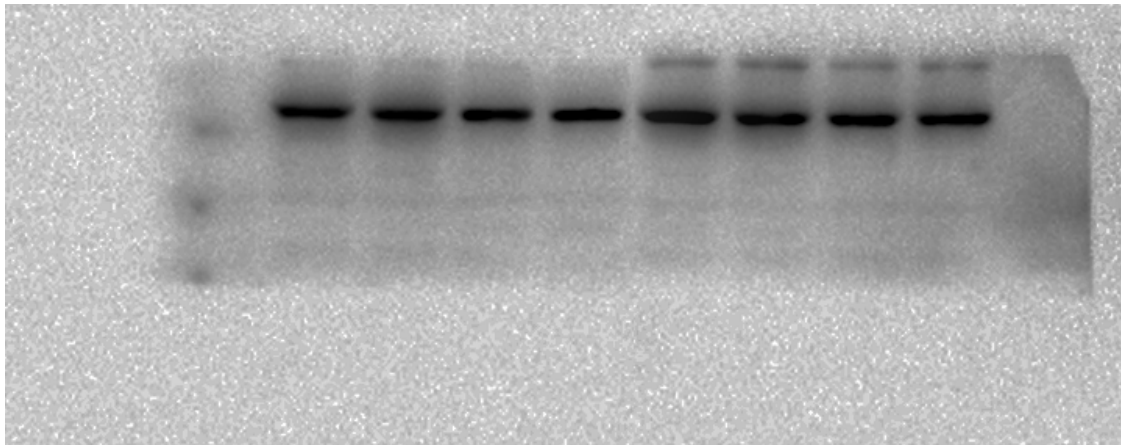

Figure 4F

After Smurf1 overexpression in AGS cells, a Co-IP assay was carried out using the Axin2 antibody, followed by western blot analysis using the ubiquitin antibody.

Ubiquitin

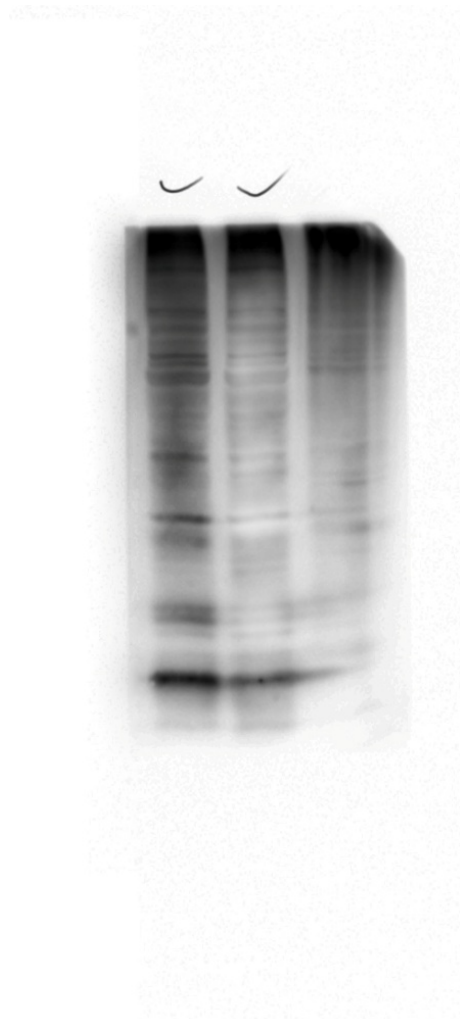

$\beta$ -actin

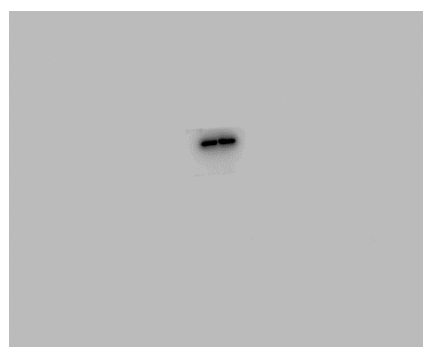

Figure 4G

After Smurf1 overexpression and treatment with 20  $\mu$ M of MG132 in AGS cells, Axin2 protein levels were measured using the western blot assay. The results were shown as the median (1st quartile and 3rd quartile). \* $p < 0.05$ .

Axin2

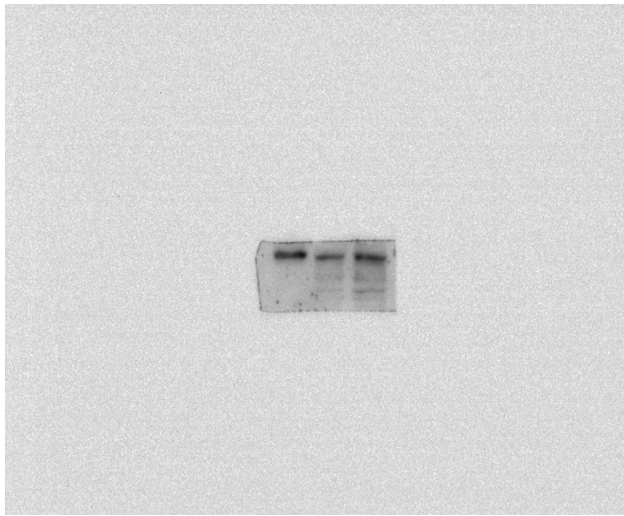

$\beta$ -actin

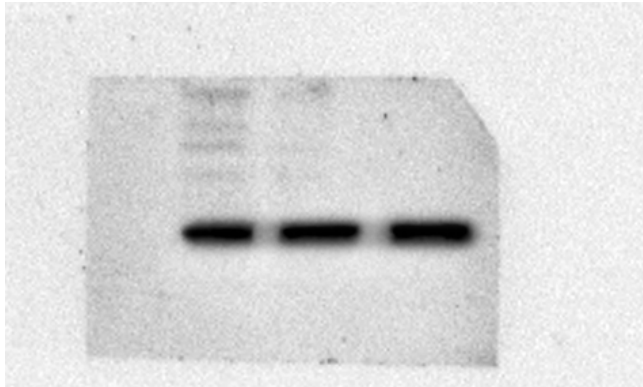

Figure 5B

After Smurf1 overexpression in AGS cells, cytoplasmic  $\beta$ -catenin protein levels were measured using the western blot assay.  $\beta$ -actin and Lamin B1 served as cytoplasmic and nuclear markers, respectively.

$\beta$ -catenin

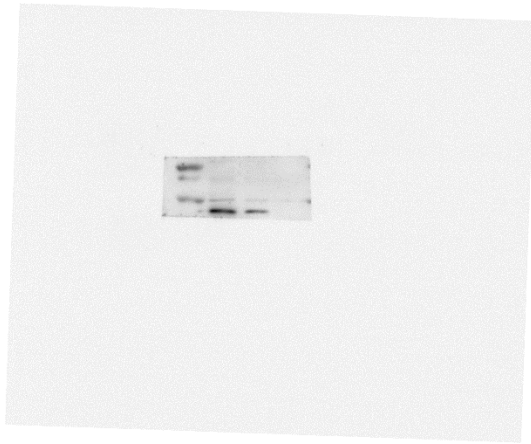

$\beta$ -actin

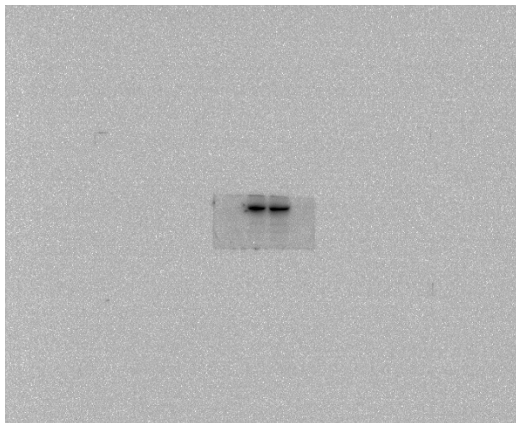

Figure 5C

After Smurf1 overexpression in AGS cells, nuclear  $\beta$ -catenin protein levels were measured using the western blot assay.  $\beta$ -actin and Lamin B1 served as cytoplasmic and nuclear markers, respectively.

$\beta$ -catenin

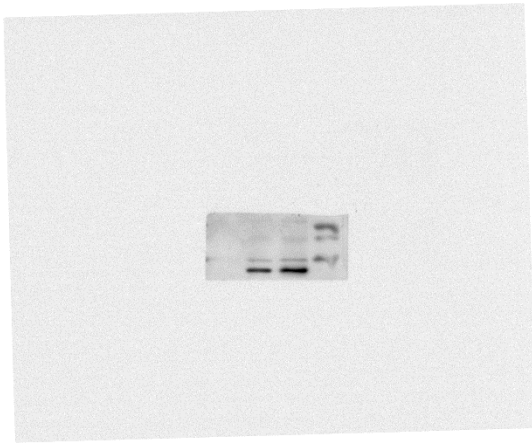

Lamin B1

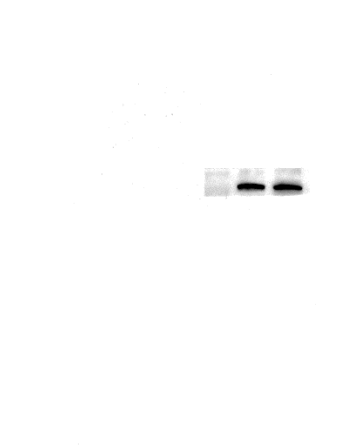

Supplement: Supplementary file 1 [file 29035fdef488067b766bd158.pdf]
