# Supplementary material for: Smurf1 promotes gastric cancer growth and metastasis by regulating Axin2- dependent Wnt/β-catenin signaling
Source: Research Square preprint supplement (doi:10.21203/rs.3.rs-6694191/v1), 2025-06-27
Supplement: Supplementary file 1 [file 2e1dd404d0593eefbd0bade6.docx]

| Indicators | Test | F | DFn | Dfd | P value |
| --- | --- | --- | --- | --- | --- |
| Figure 1B | F test | 2.174 | 25 | 30 | 0.043 |
| Figure 1C | No normally distributed data | / | / | / | / |
| Figure 2A | Brown-Forsythe test | 0.828 | 2 | 6 | 0.481 |
| Figure 2B | Use the Geisser-Greenhouse correction | / | / | / | / |
| Figure 2D | F test | 3.857 | 2 | 2 | 0.412 |
| Figure 2F | F test | 4.083 | 2 | 2 | 0.393 |
| Figure 3B | Use the Geisser-Greenhouse correction | / | / | / | / |
| Figure 3D | F test | 1.223 | 2 | 2 | 0.900 |
| Figure 3F | F test | 1.163 | 4 | 4 | 0.887 |
| Figure 4A-Axin1 | F test | 1.136 | 2 | 2 | 0.936 |
| Figure 4A-Axin2 | F test | 1.524 | 2 | 2 | 0.792 |
| Figure 4E | Use the Geisser-Greenhouse correction | / | / | / | / |
| Figure 5A | F test | 5.067 | 2 | 2 | 0.330 |
| Figure 5D-cyto | F test | 1.501 | 2 | 6 | 0.800 |
| Figure 5D-nucle | F test | 1.162 | 2 | 12 | 0.925 |
| Figure 6A | Use the Geisser-Greenhouse correction | / | / | / | / |
| Figure 6B | Brown-Forsythe test | 0.208 | 2 | 6 | 0.818 |

**Supplementary table S3. The results of homogeneity of variance**
