# Supplementary material for: Smurf1 promotes gastric cancer growth and metastasis by regulating Axin2- dependent Wnt/β-catenin signaling
Source: Research Square preprint supplement (doi:10.21203/rs.3.rs-6694191/v1), 2025-06-27
Supplement: Supplementary file 2 [file 8d380a29a978d2a4f981be12.docx]

**Supplementary table S4. The results of statistical analysis.**

| **Indicators** | **Test** | **Comparation** | **P value** | |
| --- | --- | --- | --- | --- |
| Figure 1B  Figure 1C  Figure 2A  Figure 2B  Figure 2D  Figure 2F  Figure 3B  Figure 3D  Figure 3F  Figure 4A  Figure 4E  Figure 5A  Figure 5D-cyto  Figure 5D-nucle  Figure 6A  Figure 6B | Welch’s t-test  Mann Whitney test  Kruskal-Wallis test followed by Dunnett’s post hoc test  Kruskal-Wallis test followed by Dunnett’s post hoc test  Repeated measures (RM) ANOVA, Bonferroni’s multiple comparisons test  RM ANOVA, Bonferroni’s multiple comparisons test  RM ANOVA, Bonferroni’s multiple comparisons test  RM ANOVA, Bonferroni’s multiple comparisons test  Mann Whitney test  Mann Whitney test  RM ANOVA, Bonferroni’s multiple comparisons test  RM ANOVA, Bonferroni’s multiple comparisons test  RM ANOVA, Bonferroni’s multiple comparisons test  RM ANOVA, Bonferroni’s multiple comparisons test  Mann Whitney test  Mann Whitney test  Mann Whitney test  Mann Whitney test  RM ANOVA, Bonferroni’s multiple comparisons test  RM ANOVA, Bonferroni’s multiple comparisons test  RM ANOVA, Bonferroni’s multiple comparisons test  RM ANOVA, Bonferroni’s multiple comparisons test  Mann Whitney test  Mann Whitney test  Mann Whitney test  RM ANOVA, Bonferroni’s multiple comparisons test  RM ANOVA, Bonferroni’s multiple comparisons test  RM ANOVA, Bonferroni’s multiple comparisons test  RM ANOVA, Bonferroni’s multiple comparisons test  RM ANOVA, Bonferroni’s multiple comparisons test  RM ANOVA, Bonferroni’s multiple comparisons test  RM ANOVA, Bonferroni’s multiple comparisons test  RM ANOVA, Bonferroni’s multiple comparisons test  Kruskal-Wallis test followed by Dunnett’s post hoc test  Kruskal-Wallis test followed by Dunnett’s post hoc test | Gastric cancer vs. Normal control  Gastric cancer vs. Normal control  AGS vs. Ges-1  MKN-45 vs. Ges-1  0h, Smurf1 vs. Ctrl  24h, Smurf1 vs. Ctrl  48h, Smurf1 vs. Ctrl  72h, Smurf1 vs. Ctrl  Smurf1 vs. Ctrl  Smurf1 vs. Ctrl  7d, Smurf1 vs. Ctrl  14d, Smurf1 vs. Ctrl  21d, Smurf1 vs. Ctrl  35d, Smurf1 vs. Ctrl  Smurf1 vs. Ctrl  Smurf1 vs. Ctrl  Axin1: Smurf1 vs. Ctrl  Axin2: Smurf1 vs. Ctrl  0h, Smurf1 vs. Ctrl  2h, Smurf1 vs. Ctrl  4h, Smurf1 vs. Ctrl  8h, Smurf1 vs. Ctrl  Smurf1 vs. Ctrl  Smurf1 vs. Ctrl  Smurf1 vs. Ctrl  0h, Smurf1 vs. Ctrl  0h, Smurf1 vs. Smurf1+IWR-1  24h, Smurf1 vs. Ctrl  24h, Smurf1 vs. Smurf1+IWR-1  48h, Smurf1 vs. Ctrl  48h, Smurf1 vs. Smurf1+IWR-1  72h, Smurf1 vs. Ctrl  72h, Smurf1 vs. Smurf1+IWR-1  Smurf1 vs. Ctrl  Smurf1 vs. Smurf1+IWR-1 | 0.001  0.027  0.032  <0.001  >0.999  0.752  0.005  <0.001  0.008  0.008  >0.999  >0.999  0.019  0.049  0.008  0.040  0.400  0.700  >0.999  0.404  0.006  0.014  0.008  0.029  0.029  0.998  >0.999  0.129  0.155  0.041  0.168  0.011  0.029  <0.001  0.041 | |
|  |  |  | |  | |
