# Supplementary material for: Smurf1 promotes gastric cancer growth and metastasis by regulating Axin2- dependent Wnt/β-catenin signaling
Source: Research Square preprint supplement (doi:10.21203/rs.3.rs-6694191/v1), 2025-06-27
Supplement: Supplementary file 3 [file a54879c698e9233ea82dd0fa.xlsx]

## Sheet: Sheet1
Supporting Table S5. Predicted target protein regulated by Smurf1 using ubibrowser tool (http://ubibrowser.bio-it.cn/ubibrowser/)
Rank	Gene symbol	Gene description	Score	Confidence level	Supproting evidences	Sequence view
1	TEC	Tyrosine-protein kinase Tec	0.878	HIGH	Detail	Detail
2	BMX	Cytoplasmic tyrosine-protein kinase BMX	0.878	HIGH	Detail	Detail
3	FER	Tyrosine-protein kinase Fer	0.878	HIGH	Detail	Detail
4	MAP3K11	Mitogen-activated protein kinase kinase kinase 11	0.878	HIGH	Detail	Detail
5	PTK6	Protein-tyrosine kinase 6	0.876	HIGH	Detail	Detail
6	YES1	Tyrosine-protein kinase Yes	0.876	HIGH	Detail	Detail
7	CSK	Tyrosine-protein kinase CSK	0.874	HIGH	Detail	Detail
8	HCK	Tyrosine-protein kinase HCK	0.874	HIGH	Detail	Detail
9	LYN	Tyrosine-protein kinase Lyn	0.866	HIGH	Detail	Detail
10	FRK	Tyrosine-protein kinase FRK	0.866	HIGH	Detail	Detail
11	SYK	Tyrosine-protein kinase SYK	0.866	HIGH	Detail	Detail
12	ABL2	Abelson tyrosine-protein kinase 2	0.866	HIGH	Detail	Detail
13	FYN	Tyrosine-protein kinase Fyn	0.866	HIGH	Detail	Detail
14	PIM1	Serine/threonine-protein kinase pim-1	0.864	HIGH	Detail	Detail
15	TYK2	Non-receptor tyrosine-protein kinase TYK2	0.864	HIGH	Detail	Detail
16	ABL1	Tyrosine-protein kinase ABL1	0.861	HIGH	Detail	Detail
17	SRC	Proto-oncogene tyrosine-protein kinase Src	0.861	HIGH	Detail	Detail
18	RPS6KA2	Ribosomal protein S6 kinase alpha-2	0.861	HIGH	Detail	Detail
19	PRKG1	cGMP-dependent protein kinase 1	0.861	HIGH	Detail	Detail
20	AURKA	Aurora kinase A	0.861	HIGH	Detail	Detail
21	FLT1	Vascular endothelial growth factor receptor 1	0.861	HIGH	Detail	Detail
22	TXK	Tyrosine-protein kinase TXK	0.86	HIGH	Detail	Detail
23	GRK6	G protein-coupled receptor kinase 6	0.859	HIGH	Detail	Detail
24	EPHB6	Ephrin type-B receptor 6	0.859	HIGH	Detail	Detail
25	GRK5	G protein-coupled receptor kinase 5	0.859	HIGH	Detail	Detail
26	FGFR3	Fibroblast growth factor receptor 3	0.859	HIGH	Detail	Detail
27	FGFR4	Fibroblast growth factor receptor 4	0.859	HIGH	Detail	Detail
28	PRKCH	Protein kinase C eta type	0.859	HIGH	Detail	Detail
29	EPN3	Epsin-3	0.859	HIGH	Detail	Detail
30	VRK2	Serine/threonine-protein kinase VRK2	0.859	HIGH	Detail	Detail
31	CSF1R	Macrophage colony-stimulating factor 1 receptor	0.859	HIGH	Detail	Detail
32	ALK	ALK tyrosine kinase receptor	0.859	HIGH	Detail	Detail
33	RPS6KA3	Ribosomal protein S6 kinase alpha-3	0.856	HIGH	Detail	Detail
34	PRKCE	Protein kinase C epsilon type	0.856	HIGH	Detail	Detail
35	PKN2	Serine/threonine-protein kinase N2	0.856	HIGH	Detail	Detail
36	PRKCQ	Protein kinase C theta type	0.856	HIGH	Detail	Detail
37	FGFR1	Fibroblast growth factor receptor 1	0.856	HIGH	Detail	Detail
38	PDGFRB	Platelet-derived growth factor receptor beta	0.856	HIGH	Detail	Detail
39	KDR	Vascular endothelial growth factor receptor 2	0.856	HIGH	Detail	Detail
40	RET	Proto-oncogene tyrosine-protein kinase receptor Ret	0.856	HIGH	Detail	Detail
41	MET	Hepatocyte growth factor receptor	0.856	HIGH	Detail	Detail
42	PKN1	Serine/threonine-protein kinase N1	0.856	HIGH	Detail	Detail
43	MST1R	Macrophage-stimulating protein receptor	0.856	HIGH	Detail	Detail
44	RPS6KA4	Ribosomal protein S6 kinase alpha-4	0.856	HIGH	Detail	Detail
45	PRKCB	Protein kinase C beta type	0.856	HIGH	Detail	Detail
46	RPS6KA5	Ribosomal protein S6 kinase alpha-5	0.856	HIGH	Detail	Detail
47	PTK2	Focal adhesion kinase 1	0.851	HIGH	Detail	Detail
48	MAP3K5	Mitogen-activated protein kinase kinase kinase 5	0.851	HIGH	Detail	Detail
49	MAPK4	Mitogen-activated protein kinase 4	0.851	HIGH	Detail	Detail
50	ACVR2B	Activin receptor type-2B	0.848	HIGH	Detail	Detail
51	ACVR2A	Activin receptor type-2A	0.848	HIGH	Detail	Detail
52	GRK4	G protein-coupled receptor kinase 4	0.848	HIGH	Detail	Detail
53	PRKCZ	Protein kinase C zeta type	0.848	HIGH	Detail	Detail
54	LTK	Leukocyte tyrosine kinase receptor	0.847	HIGH	Detail	Detail
55	VRK1	Serine/threonine-protein kinase VRK1	0.847	HIGH	Detail	Detail
56	TEK	Angiopoietin-1 receptor	0.847	HIGH	Detail	Detail
57	FLT3	Receptor-type tyrosine-protein kinase FLT3	0.847	HIGH	Detail	Detail
58	PRKACA	cAMP-dependent protein kinase catalytic subunit alpha	0.847	HIGH	Detail	Detail
59	AURKB	Aurora kinase B	0.847	HIGH	Detail	Detail
60	HECTD1	E3 ubiquitin-protein ligase HECTD1	0.847	HIGH	Detail	Detail
61	RPS6KA1	Ribosomal protein S6 kinase alpha-1	0.847	HIGH	Detail	Detail
62	FLT4	Vascular endothelial growth factor receptor 3	0.847	HIGH	Detail	Detail
63	FGFR2	Fibroblast growth factor receptor 2	0.847	HIGH	Detail	Detail
64	BLK	Tyrosine-protein kinase Blk	0.846	HIGH	Detail	Detail
65	MLK4	Mitogen-activated protein kinase kinase kinase MLK4	0.846	HIGH	Detail	Detail
66	SRMS	Tyrosine-protein kinase Srms	0.846	HIGH	Detail	Detail
67	STYK1	Tyrosine-protein kinase STYK1	0.846	HIGH	Detail	Detail
68	TRIO	Triple functional domain protein	0.845	HIGH	Detail	Detail
69	PAK3	Serine/threonine-protein kinase PAK 3	0.845	HIGH	Detail	Detail
70	SRPK1	SRSF protein kinase 1	0.845	HIGH	Detail	Detail
71	SH3GL1	Endophilin-A2	0.845	HIGH	Detail	Detail
72	STK4	Serine/threonine-protein kinase 4	0.845	HIGH	Detail	Detail
73	ERN1	Serine/threonine-protein kinase/endoribonuclease IRE1	0.845	HIGH	Detail	Detail
74	WWP1	NEDD4-like E3 ubiquitin-protein ligase WWP1	0.845	HIGH	Detail	Detail
75	BUB1	Mitotic checkpoint serine/threonine-protein kinase BUB1	0.845	HIGH	Detail	Detail
76	MKNK1	MAP kinase-interacting serine/threonine-protein kinase 1	0.845	HIGH	Detail	Detail
77	TRIM27	Zinc finger protein RFP	0.845	HIGH	Detail	Detail
78	MAST2	Microtubule-associated serine/threonine-protein kinase 2	0.845	HIGH	Detail	Detail
79	DLG1	Disks large homolog 1	0.845	HIGH	Detail	Detail
80	MAP2K2	Dual specificity mitogen-activated protein kinase kinase 2	0.845	HIGH	Detail	Detail
81	AXL	Tyrosine-protein kinase receptor UFO	0.845	HIGH	Detail	Detail
82	BIRC6	Baculoviral IAP repeat-containing protein 6	0.843	HIGH	Detail	Detail
83	HIP1R	Huntingtin-interacting protein 1-related protein	0.843	HIGH	Detail	Detail
84	BUB1B	Mitotic checkpoint serine/threonine-protein kinase BUB1 beta	0.843	HIGH	Detail	Detail
85	SH3GL3	Endophilin-A3	0.843	HIGH	Detail	Detail
86	MINK1	Misshapen-like kinase 1	0.843	HIGH	Detail	Detail
87	MAP4K4	Mitogen-activated protein kinase kinase kinase kinase 4	0.843	HIGH	Detail	Detail
88	LIMK2	LIM domain kinase 2	0.843	HIGH	Detail	Detail
89	STK3	Serine/threonine-protein kinase 3	0.843	HIGH	Detail	Detail
90	CPNE1	Copine-1	0.843	HIGH	Detail	Detail
91	TNIK	TRAF2 and NCK-interacting protein kinase	0.843	HIGH	Detail	Detail
92	CDC42BPG	Serine/threonine-protein kinase MRCK gamma	0.843	HIGH	Detail	Detail
93	WWP2	NEDD4-like E3 ubiquitin-protein ligase WWP2	0.843	HIGH	Detail	Detail
94	SH3GL2	Endophilin-A1	0.843	HIGH	Detail	Detail
95	TTN	Titin	0.843	HIGH	Detail	Detail
96	GGA2	ADP-ribosylation factor-binding protein GGA2	0.842	HIGH	Detail	Detail
97	PRKCD	Protein kinase C delta type	0.842	HIGH	Detail	Detail
98	NEK6	Serine/threonine-protein kinase Nek6	0.842	HIGH	Detail	Detail
99	IKBKB	Inhibitor of nuclear factor kappa-B kinase subunit beta	0.842	HIGH	Detail	Detail
100	PRKX	cAMP-dependent protein kinase catalytic subunit PRKX	0.841	HIGH	Detail	Detail
101	ROS1	Proto-oncogene tyrosine-protein kinase ROS	0.841	HIGH	Detail	Detail
102	PRKG2	cGMP-dependent protein kinase 2	0.841	HIGH	Detail	Detail
103	PRKACB	cAMP-dependent protein kinase catalytic subunit beta	0.841	HIGH	Detail	Detail
104	PKN3	Serine/threonine-protein kinase N3	0.841	HIGH	Detail	Detail
105	ARHGAP5	Rho GTPase-activating protein 5	0.841	HIGH	Detail	Detail
106	PARK2	E3 ubiquitin-protein ligase parkin	0.841	HIGH	Detail	Detail
107	ITCH	E3 ubiquitin-protein ligase Itchy homolog	0.841	HIGH	Detail	Detail
108	BRAF	Serine/threonine-protein kinase B-raf	0.841	HIGH	Detail	Detail
109	CDK11B	Cyclin-dependent kinase 11B	0.841	HIGH	Detail	Detail
110	CHEK2	Serine/threonine-protein kinase Chk2	0.841	HIGH	Detail	Detail
111	MAP2K6	Dual specificity mitogen-activated protein kinase kinase 6	0.841	HIGH	Detail	Detail
112	SCNN1A	Amiloride-sensitive sodium channel subunit alpha	0.84	HIGH	Detail	Detail
113	LRSAM1	E3 ubiquitin-protein ligase LRSAM1	0.831	HIGH	Detail	Detail
114	HUWE1	E3 ubiquitin-protein ligase HUWE1	0.831	HIGH	Detail	Detail
115	SCN8A	Sodium channel protein type 8 subunit alpha	0.831	HIGH	Detail	Detail
116	RUNX1	Runt-related transcription factor 1	0.831	HIGH	Detail	Detail
117	UBE2Q1	Ubiquitin-conjugating enzyme E2 Q1	0.831	HIGH	Detail	Detail
118	OASL	2'-5'-oligoadenylate synthase-like protein	0.831	HIGH	Detail	Detail
119	LATS1	Serine/threonine-protein kinase LATS1	0.831	HIGH	Detail	Detail
120	ERBB2	Receptor tyrosine-protein kinase erbB-2	0.831	HIGH	Detail	Detail
121	MYO10	Unconventional myosin-X	0.831	HIGH	Detail	Detail
122	RNF40	E3 ubiquitin-protein ligase BRE1B	0.831	HIGH	Detail	Detail
123	CSNK1A1	Casein kinase I isoform alpha	0.831	HIGH	Detail	Detail
124	PBK	Lymphokine-activated killer T-cell-originated protein kinase	0.831	HIGH	Detail	Detail
125	EPB41	Protein 4.1	0.831	HIGH	Detail	Detail
126	MYO3A	Myosin-IIIa	0.831	HIGH	Detail	Detail
127	SLK	STE20-like serine/threonine-protein kinase	0.831	HIGH	Detail	Detail
128	AVPR1A	Vasopressin V1a receptor	0.831	HIGH	Detail	Detail
129	SIK3	Serine/threonine-protein kinase SIK3	0.831	HIGH	Detail	Detail
130	PAK2	Serine/threonine-protein kinase PAK 2	0.831	HIGH	Detail	Detail
131	UBR5	E3 ubiquitin-protein ligase UBR5	0.831	HIGH	Detail	Detail
132	MAP2K1	Dual specificity mitogen-activated protein kinase kinase 1	0.831	HIGH	Detail	Detail
133	CACNA1B	Voltage-dependent N-type calcium channel subunit alpha-1B	0.831	HIGH	Detail	Detail
134	CAMK2G	Calcium/calmodulin-dependent protein kinase type II subunit gamma	0.831	HIGH	Detail	Detail
135	ROCK1	Rho-associated protein kinase 1	0.831	HIGH	Detail	Detail
136	DDR2	Discoidin domain-containing receptor 2	0.831	HIGH	Detail	Detail
137	AP2A2	AP-2 complex subunit alpha-2	0.831	HIGH	Detail	Detail
138	TRAIP	E3 ubiquitin-protein ligase TRAIP	0.831	HIGH	Detail	Detail
139	TAOK2	Serine/threonine-protein kinase TAO2	0.831	HIGH	Detail	Detail
140	PIK3R4	Phosphoinositide 3-kinase regulatory subunit 4	0.831	HIGH	Detail	Detail
141	MYO7A	Unconventional myosin-VIIa	0.831	HIGH	Detail	Detail
142	STK36	Serine/threonine-protein kinase 36	0.831	HIGH	Detail	Detail
143	TRIP12	E3 ubiquitin-protein ligase TRIP12	0.831	HIGH	Detail	Detail
144	PIK3R3	Phosphatidylinositol 3-kinase regulatory subunit gamma	0.831	HIGH	Detail	Detail
145	LRRK1	Leucine-rich repeat serine/threonine-protein kinase 1	0.83	HIGH	Detail	Detail
146	KIF1B	Kinesin-like protein KIF1B	0.828	HIGH	Detail	Detail
147	DOCK1	Dedicator of cytokinesis protein 1	0.826	HIGH	Detail	Detail
148	AURKC	Aurora kinase C	0.826	HIGH	Detail	Detail
149	PTK7	Inactive tyrosine-protein kinase 7	0.826	HIGH	Detail	Detail
150	RPS6KA6	Ribosomal protein S6 kinase alpha-6	0.826	HIGH	Detail	Detail
151	PRKACG	cAMP-dependent protein kinase catalytic subunit gamma	0.826	HIGH	Detail	Detail
152	RPS6KL1	Ribosomal protein S6 kinase-like 1	0.826	HIGH	Detail	Detail
153	CDKL2	Cyclin-dependent kinase-like 2	0.826	HIGH	Detail	Detail
154	ULK4	Serine/threonine-protein kinase ULK4	0.826	HIGH	Detail	Detail
155	TIE1	Tyrosine-protein kinase receptor Tie-1	0.826	HIGH	Detail	Detail
156	NEK7	Serine/threonine-protein kinase Nek7	0.826	HIGH	Detail	Detail
157	ELL	RNA polymerase II elongation factor ELL	0.826	HIGH	Detail	Detail
158	PGR	Progesterone receptor	0.826	HIGH	Detail	Detail
159	THRA	Thyroid hormone receptor alpha	0.826	HIGH	Detail	Detail
160	AKAP13	A-kinase anchor protein 13	0.826	HIGH	Detail	Detail
161	BIN1	Myc box-dependent-interacting protein 1	0.825	HIGH	Detail	Detail
162	SORBS2	Sorbin and SH3 domain-containing protein 2	0.825	HIGH	Detail	Detail
163	PLA2G4A	Cytosolic phospholipase A2	0.825	HIGH	Detail	Detail
164	TNK2	Activated CDC42 kinase 1	0.825	HIGH	Detail	Detail
165	RUNX3	Runt-related transcription factor 3	0.825	HIGH	Detail	Detail
166	MAPK7	Mitogen-activated protein kinase 7	0.825	HIGH	Detail	Detail
167	JAK3	Tyrosine-protein kinase JAK3	0.825	HIGH	Detail	Detail
168	DYRK1A	Dual specificity tyrosine-phosphorylation-regulated kinase 1A	0.825	HIGH	Detail	Detail
169	IKBKE	Inhibitor of nuclear factor kappa-B kinase subunit epsilon	0.825	HIGH	Detail	Detail
170	CLK1	Dual specificity protein kinase CLK1	0.825	HIGH	Detail	Detail
171	MAPK11	Mitogen-activated protein kinase 11	0.825	HIGH	Detail	Detail
172	MAPK12	Mitogen-activated protein kinase 12	0.825	HIGH	Detail	Detail
173	ZAP70	Tyrosine-protein kinase ZAP-70	0.825	HIGH	Detail	Detail
174	NLK	Serine/threonine-protein kinase NLK	0.825	HIGH	Detail	Detail
175	STK39	STE20/SPS1-related proline-alanine-rich protein kinase	0.825	HIGH	Detail	Detail
176	RAPGEF4	Rap guanine nucleotide exchange factor 4	0.824	HIGH	Detail	Detail
177	TNKS2	Tankyrase-2	0.824	HIGH	Detail	Detail
178	ROCK2	Rho-associated protein kinase 2	0.824	HIGH	Detail	Detail
179	TAOK1	Serine/threonine-protein kinase TAO1	0.824	HIGH	Detail	Detail
180	NEK1	Serine/threonine-protein kinase Nek1	0.824	HIGH	Detail	Detail
181	ULK1	Serine/threonine-protein kinase ULK1	0.824	HIGH	Detail	Detail
182	HECW2	E3 ubiquitin-protein ligase HECW2	0.824	HIGH	Detail	Detail
183	CDC42BPA	Serine/threonine-protein kinase MRCK alpha	0.824	HIGH	Detail	Detail
184	ITSN1	Intersectin-1	0.824	HIGH	Detail	Detail
185	POU5F1	POU domain, class 5, transcription factor 1	0.823	HIGH	Detail	Detail
186	AMOTL2	Angiomotin-like protein 2	0.823	HIGH	Detail	Detail
187	CACNA1A	Voltage-dependent P/Q-type calcium channel subunit alpha-1A	0.823	HIGH	Detail	Detail
188	CACNA1C	Voltage-dependent L-type calcium channel subunit alpha-1C	0.823	HIGH	Detail	Detail
189	TRIM9	E3 ubiquitin-protein ligase TRIM9	0.823	HIGH	Detail	Detail
190	PLCB3	1-phosphatidylinositol 4,5-bisphosphate phosphodiesterase beta-3	0.823	HIGH	Detail	Detail
191	TRAF5	TNF receptor-associated factor 5	0.823	HIGH	Detail	Detail
192	CREB5	Cyclic AMP-responsive element-binding protein 5	0.823	HIGH	Detail	Detail
193	RYR2	Ryanodine receptor 2	0.823	HIGH	Detail	Detail
194	RIPK3	Receptor-interacting serine/threonine-protein kinase 3	0.822	HIGH	Detail	Detail
195	EIF2AK1	Eukaryotic translation initiation factor 2-alpha kinase 1	0.822	HIGH	Detail	Detail
196	MAP3K12	Mitogen-activated protein kinase kinase kinase 12	0.822	HIGH	Detail	Detail
197	MAPK6	Mitogen-activated protein kinase 6	0.822	HIGH	Detail	Detail
198	MAP3K1	Mitogen-activated protein kinase kinase kinase 1	0.822	HIGH	Detail	Detail
199	UNC13D	Protein unc-13 homolog D	0.821	HIGH	Detail	Detail
200	PLK3	Serine/threonine-protein kinase PLK3	0.821	HIGH	Detail	Detail
201	STK11	Serine/threonine-protein kinase STK11	0.821	HIGH	Detail	Detail
202	AXIN2	Axin-2	0.821	HIGH	Detail	Detail
203	USP7	Ubiquitin carboxyl-terminal hydrolase 7	0.821	HIGH	Detail	Detail
204	EZR	Ezrin	0.821	HIGH	Detail	Detail
205	STARD13	StAR-related lipid transfer protein 13	0.82	HIGH	Detail	Detail
206	SPTAN1	Spectrin alpha chain, non-erythrocytic 1	0.82	HIGH	Detail	Detail
207	TP53BP2	Apoptosis-stimulating of p53 protein 2	0.82	HIGH	Detail	Detail
208	MAPK10	Mitogen-activated protein kinase 10	0.819	HIGH	Detail	Detail
209	JAK1	Tyrosine-protein kinase JAK1	0.819	HIGH	Detail	Detail
210	MAP4K1	Mitogen-activated protein kinase kinase kinase kinase 1	0.819	HIGH	Detail	Detail
211	PLK1	Serine/threonine-protein kinase PLK1	0.819	HIGH	Detail	Detail
212	MAP3K4	Mitogen-activated protein kinase kinase kinase 4	0.819	HIGH	Detail	Detail
213	MAP3K8	Mitogen-activated protein kinase kinase kinase 8	0.819	HIGH	Detail	Detail
214	PAK1	Serine/threonine-protein kinase PAK 1	0.818	HIGH	Detail	Detail
215	ACVR1	Activin receptor type-1	0.818	HIGH	Detail	Detail
216	SMAD4	Mothers against decapentaplegic homolog 4	0.818	HIGH	Detail	Detail
217	MAGI1	Membrane-associated guanylate kinase, WW and PDZ domain-containing protein 1	0.815	HIGH	Detail	Detail
218	EEA1	Early endosome antigen 1	0.815	HIGH	Detail	Detail
219	SMURF1	E3 ubiquitin-protein ligase SMURF1	0.815	HIGH	Detail	Detail
220	SMAD2	Mothers against decapentaplegic homolog 2	0.814	HIGH	Detail	Detail
221	SMAD3	Mothers against decapentaplegic homolog 3	0.814	HIGH	Detail	Detail
222	AMHR2	Anti-Muellerian hormone type-2 receptor	0.812	HIGH	Detail	Detail
223	ACVRL1	Serine/threonine-protein kinase receptor R3	0.812	HIGH	Detail	Detail
224	ACVR1B	Activin receptor type-1B	0.812	HIGH	Detail	Detail
225	CACNB1	Voltage-dependent L-type calcium channel subunit beta-1	0.811	HIGH	Detail	Detail
226	CACNB2	Voltage-dependent L-type calcium channel subunit beta-2	0.811	HIGH	Detail	Detail
227	HGS	Hepatocyte growth factor-regulated tyrosine kinase substrate	0.811	HIGH	Detail	Detail
228	SPTA1	Spectrin alpha chain, erythrocytic 1	0.81	HIGH	Detail	Detail
229	NF2	Merlin	0.81	HIGH	Detail	Detail
230	SH3KBP1	SH3 domain-containing kinase-binding protein 1	0.81	HIGH	Detail	Detail
231	ITSN2	Intersectin-2	0.81	HIGH	Detail	Detail
232			0.81	HIGH	Detail	Detail
233	NOTCH3	Neurogenic locus notch homolog protein 3	0.809	HIGH	Detail	Detail
234	DIXDC1	Dixin	0.809	HIGH	Detail	Detail
235	UBQLN4	Ubiquilin-4	0.809	HIGH	Detail	Detail
236	RIMS2	Regulating synaptic membrane exocytosis protein 2	0.809	HIGH	Detail	Detail
237	PTPN3	Tyrosine-protein phosphatase non-receptor type 3	0.809	HIGH	Detail	Detail
238	PLCD3	1-phosphatidylinositol 4,5-bisphosphate phosphodiesterase delta-3	0.809	HIGH	Detail	Detail
239	PJA1	E3 ubiquitin-protein ligase Praja-1	0.809	HIGH	Detail	Detail
240	RNF11	RING finger protein 11	0.809	HIGH	Detail	Detail
241	CARD16	Caspase recruitment domain-containing protein 16	0.809	HIGH	Detail	Detail
242	EDNRB	Endothelin B receptor	0.809	HIGH	Detail	Detail
243	RDX	Radixin	0.809	HIGH	Detail	Detail
244	CARD10	Caspase recruitment domain-containing protein 10	0.809	HIGH	Detail	Detail
245	MAP3K3	Mitogen-activated protein kinase kinase kinase 3	0.809	HIGH	Detail	Detail
246	TCERG1	Transcription elongation regulator 1	0.809	HIGH	Detail	Detail
247	RORA	Nuclear receptor ROR-alpha	0.809	HIGH	Detail	Detail
248	HIVEP1	Zinc finger protein 40	0.809	HIGH	Detail	Detail
249	DEF6	Differentially expressed in FDCP 6 homolog	0.809	HIGH	Detail	Detail
250	MAPK15	Mitogen-activated protein kinase 15	0.809	HIGH	Detail	Detail
251	JAK2	Tyrosine-protein kinase JAK2	0.809	HIGH	Detail	Detail
252	FOS	Proto-oncogene c-Fos	0.809	HIGH	Detail	Detail
253	PTK2B	Protein-tyrosine kinase 2-beta	0.809	HIGH	Detail	Detail
254	TESK2	Dual specificity testis-specific protein kinase 2	0.809	HIGH	Detail	Detail
255	MAP3K14	Mitogen-activated protein kinase kinase kinase 14	0.809	HIGH	Detail	Detail
256	HERC2	E3 ubiquitin-protein ligase HERC2	0.809	HIGH	Detail	Detail
257	TNK1	Non-receptor tyrosine-protein kinase TNK1	0.809	HIGH	Detail	Detail
258	TESK1	Dual specificity testis-specific protein kinase 1	0.809	HIGH	Detail	Detail
259	MAPK9	Mitogen-activated protein kinase 9	0.809	HIGH	Detail	Detail
260	MAPK13	Mitogen-activated protein kinase 13	0.809	HIGH	Detail	Detail
261	IRAK1	Interleukin-1 receptor-associated kinase 1	0.809	HIGH	Detail	Detail
262	CYTH3	Cytohesin-3	0.808	HIGH	Detail	Detail
263	COL4A3BP	Collagen type IV alpha-3-binding protein	0.808	HIGH	Detail	Detail
264	RASGRP1	RAS guanyl-releasing protein 1	0.808	HIGH	Detail	Detail
265	ARNT2	Aryl hydrocarbon receptor nuclear translocator 2	0.808	HIGH	Detail	Detail
266	TNKS	Tankyrase-1	0.808	HIGH	Detail	Detail
267	PACSIN1	Protein kinase C and casein kinase substrate in neurons protein 1	0.808	HIGH	Detail	Detail
268	DGKH	Diacylglycerol kinase eta	0.808	HIGH	Detail	Detail
269	ARAP3	Arf-GAP with Rho-GAP domain, ANK repeat and PH domain-containing protein 3	0.808	HIGH	Detail	Detail
270	FNBP1L	Formin-binding protein 1-like	0.808	HIGH	Detail	Detail
271	SACS	Sacsin	0.808	HIGH	Detail	Detail
272	PIKFYVE	1-phosphatidylinositol 3-phosphate 5-kinase	0.808	HIGH	Detail	Detail
273	SNX25	Sorting nexin-25	0.808	HIGH	Detail	Detail
274	RASL11A	Ras-like protein family member 11A	0.808	HIGH	Detail	Detail
275	RNF213	E3 ubiquitin-protein ligase RNF213	0.808	HIGH	Detail	Detail
276	KALRN	Kalirin	0.808	HIGH	Detail	Detail
277	ARHGAP33	Rho GTPase-activating protein 33	0.808	HIGH	Detail	Detail
278	BZRAP1	Peripheral-type benzodiazepine receptor-associated protein 1	0.808	HIGH	Detail	Detail
279	MAST4	Microtubule-associated serine/threonine-protein kinase 4	0.808	HIGH	Detail	Detail
280	CPNE3	Copine-3	0.808	HIGH	Detail	Detail
281	RNF20	E3 ubiquitin-protein ligase BRE1A	0.808	HIGH	Detail	Detail
282	AATK	Serine/threonine-protein kinase LMTK1	0.808	HIGH	Detail	Detail
283	CDK11A	Cyclin-dependent kinase 11A	0.808	HIGH	Detail	Detail
284	SPEG	Striated muscle preferentially expressed protein kinase	0.808	HIGH	Detail	Detail
285	CDC42BPB	Serine/threonine-protein kinase MRCK beta	0.808	HIGH	Detail	Detail
286	SH3PXD2B	SH3 and PX domain-containing protein 2B	0.808	HIGH	Detail	Detail
287	NEK4	Serine/threonine-protein kinase Nek4	0.808	HIGH	Detail	Detail
288	ARHGAP32	Rho GTPase-activating protein 32	0.808	HIGH	Detail	Detail
289	POMK	Protein O-mannose kinase	0.808	HIGH	Detail	Detail
290	ULK3	Serine/threonine-protein kinase ULK3	0.808	HIGH	Detail	Detail
291	MYO7B	Unconventional myosin-VIIb	0.808	HIGH	Detail	Detail
292	CSNK1A1L	Casein kinase I isoform alpha-like	0.808	HIGH	Detail	Detail
293	STK10	Serine/threonine-protein kinase 10	0.808	HIGH	Detail	Detail
294	NRK	Nik-related protein kinase	0.808	HIGH	Detail	Detail
295	PCLO	Protein piccolo	0.808	HIGH	Detail	Detail
296	WNK3	Serine/threonine-protein kinase WNK3	0.808	HIGH	Detail	Detail
297	GUCY2F	Retinal guanylyl cyclase 2	0.808	HIGH	Detail	Detail
298	AREL1	Apoptosis-resistant E3 ubiquitin protein ligase 1	0.808	HIGH	Detail	Detail
299	RAI14	Ankycorbin	0.806	HIGH	Detail	Detail
300	SNCAIP	Synphilin-1	0.806	HIGH	Detail	Detail
301	NR1H2	Oxysterols receptor LXR-beta	0.806	HIGH	Detail	Detail
302	YY1	Transcriptional repressor protein YY1	0.804	HIGH	Detail	Detail
303	CACNB4	Voltage-dependent L-type calcium channel subunit beta-4	0.804	HIGH	Detail	Detail
304	SVEP1	Sushi, von Willebrand factor type A, EGF and pentraxin domain-containing protein 1	0.803	HIGH	Detail	Detail
305	PLAGL1	Zinc finger protein PLAGL1	0.803	HIGH	Detail	Detail
306	YAP1	Yorkie homolog	0.803	HIGH	Detail	Detail
307	SF3A1	Splicing factor 3A subunit 1	0.803	HIGH	Detail	Detail
308	TLN2	Talin-2	0.803	HIGH	Detail	Detail
309	CARD14	Caspase recruitment domain-containing protein 14	0.803	HIGH	Detail	Detail
310	TRAF2	TNF receptor-associated factor 2	0.803	HIGH	Detail	Detail
311	EGFR	Epidermal growth factor receptor	0.803	HIGH	Detail	Detail
312	MAPK8	Mitogen-activated protein kinase 8	0.802	HIGH	Detail	Detail
313	MAP3K7	Mitogen-activated protein kinase kinase kinase 7	0.802	HIGH	Detail	Detail
314	MAPK14	Mitogen-activated protein kinase 14	0.802	HIGH	Detail	Detail
315	MAPK3	Mitogen-activated protein kinase 3	0.802	HIGH	Detail	Detail
316	ERBB3	Receptor tyrosine-protein kinase erbB-3	0.802	HIGH	Detail	Detail
317	RHOU	Rho-related GTP-binding protein RhoU	0.802	HIGH	Detail	Detail
318	RAB14	Ras-related protein Rab-14	0.802	HIGH	Detail	Detail
319	UBE2D2	Ubiquitin-conjugating enzyme E2 D2	0.802	HIGH	Detail	Detail
320	ERBB4	Receptor tyrosine-protein kinase erbB-4	0.802	HIGH	Detail	Detail
321	RAB22A	Ras-related protein Rab-22A	0.802	HIGH	Detail	Detail
322	SCN5A	Sodium channel protein type 5 subunit alpha	0.802	HIGH	Detail	Detail
323	SCN2A	Sodium channel protein type 2 subunit alpha	0.802	HIGH	Detail	Detail
324	STRADB	STE20-related kinase adapter protein beta	0.802	HIGH	Detail	Detail
325	LIMK1	LIM domain kinase 1	0.802	HIGH	Detail	Detail
326	MAPKAPK2	MAP kinase-activated protein kinase 2	0.802	HIGH	Detail	Detail
327	CARD11	Caspase recruitment domain-containing protein 11	0.802	HIGH	Detail	Detail
328	HIPK1	Homeodomain-interacting protein kinase 1	0.802	HIGH	Detail	Detail
329	PAK4	Serine/threonine-protein kinase PAK 4	0.802	HIGH	Detail	Detail
330	KSR1	Kinase suppressor of Ras 1	0.802	HIGH	Detail	Detail
331	RLIM	E3 ubiquitin-protein ligase RLIM	0.802	HIGH	Detail	Detail
332	PAK6	Serine/threonine-protein kinase PAK 6	0.802	HIGH	Detail	Detail
333	CDK16	Cyclin-dependent kinase 16	0.802	HIGH	Detail	Detail
334	UBE3A	Ubiquitin-protein ligase E3A	0.802	HIGH	Detail	Detail
335	MKNK2	MAP kinase-interacting serine/threonine-protein kinase 2	0.802	HIGH	Detail	Detail
336	DYRK1B	Dual specificity tyrosine-phosphorylation-regulated kinase 1B	0.802	HIGH	Detail	Detail
337	NEDD4L	E3 ubiquitin-protein ligase NEDD4-like	0.802	HIGH	Detail	Detail
338	DAPK1	Death-associated protein kinase 1	0.802	HIGH	Detail	Detail
339	MAP2K3	Dual specificity mitogen-activated protein kinase kinase 3	0.802	HIGH	Detail	Detail
340	KSR2	Kinase suppressor of Ras 2	0.802	HIGH	Detail	Detail
341	ARAF	Serine/threonine-protein kinase A-Raf	0.802	HIGH	Detail	Detail
342	EPHB2	Ephrin type-B receptor 2	0.802	HIGH	Detail	Detail
343	LNX1	E3 ubiquitin-protein ligase LNX	0.802	HIGH	Detail	Detail
344	MARK3	MAP/microtubule affinity-regulating kinase 3	0.802	HIGH	Detail	Detail
345	HERC1	Probable E3 ubiquitin-protein ligase HERC1	0.802	HIGH	Detail	Detail
346	IRAK2	Interleukin-1 receptor-associated kinase-like 2	0.802	HIGH	Detail	Detail
347	AR	Androgen receptor	0.802	HIGH	Detail	Detail
348	ATF6	Cyclic AMP-dependent transcription factor ATF-6 alpha	0.802	HIGH	Detail	Detail
349	PPP1R13B	Apoptosis-stimulating of p53 protein 1	0.802	HIGH	Detail	Detail
350	SYT9	Synaptotagmin-9	0.802	HIGH	Detail	Detail
351	SYNGAP1	Ras/Rap GTPase-activating protein SynGAP	0.802	HIGH	Detail	Detail
352	ARHGAP10	Rho GTPase-activating protein 10	0.802	HIGH	Detail	Detail
353	CHFR	E3 ubiquitin-protein ligase CHFR	0.802	HIGH	Detail	Detail
354	CACNA1D	Voltage-dependent L-type calcium channel subunit alpha-1D	0.802	HIGH	Detail	Detail
355	ARHGAP26	Rho GTPase-activating protein 26	0.802	HIGH	Detail	Detail
356	DTX3L	E3 ubiquitin-protein ligase DTX3L	0.802	HIGH	Detail	Detail
357	RNF128	E3 ubiquitin-protein ligase RNF128	0.802	HIGH	Detail	Detail
358	MAP3K13	Mitogen-activated protein kinase kinase kinase 13	0.801	HIGH	Detail	Detail
359	MAP3K6	Mitogen-activated protein kinase kinase kinase 6	0.801	HIGH	Detail	Detail
360	GGA3	ADP-ribosylation factor-binding protein GGA3	0.801	HIGH	Detail	Detail
361	AP2A1	AP-2 complex subunit alpha-1	0.801	HIGH	Detail	Detail
