# Supplementary material for: Smurf1 promotes gastric cancer growth and metastasis by regulating Axin2- dependent Wnt/β-catenin signaling
Source: Research Square preprint supplement (doi:10.21203/rs.3.rs-6694191/v1), 2025-06-27
Supplement: Supplementary file 4 [file ad70f3270b3b18acc6a34924.docx]

**Supporting Table S1. qPCR primes used in the study.**

**Smurf1**

Forward primer CGATGAAGAAAGGAGGGCCA

Reverse primer CCTGTAGAACCTTGCAAAGCC

**Axin1**

Forward primer CTACCTCACATTCCCCGCAC

Reverse primer TCCTCACCTTCCTCCTCCAT

**Axin2**

Forward primer CTCAGTAACAGCCCGAGAGC

Reverse primer GGGCTCATCTGAACCTCCTC

**β-actin**

Forward primer ACACCCTTTCTTGACAAAACCT

Reverse primer CGCATCTCATATTTGGAATGACT
