# Supplementary material for: Smurf1 promotes gastric cancer growth and metastasis by regulating Axin2- dependent Wnt/β-catenin signaling
Source: Research Square preprint supplement (doi:10.21203/rs.3.rs-6694191/v1), 2025-06-27
Supplement: Supplementary file 5 [file e75d4e564ad7dbee7e7e6f34.docx]

**Supplementary table S2. The results of Normality test.**

| Figure | Group | Test | W | P |
| --- | --- | --- | --- | --- |
| Figure 1B | Normal control  Gastric cancer | Shapiro-Wilk test  Shapiro-Wilk test | 0.977  0.956 | 0.738  0.317 |
| Figure 1C | Normal control  Gastric cancer | Shapiro-Wilk test  Shapiro-Wilk test | 0.914  0.936 | 0.021  0.078 |
| Figure 2A | Ges-1  AGS  MKN-45 | Shapiro-Wilk test  Shapiro-Wilk test  Shapiro-Wilk test | 0.976  0.916  0.907 | 0.943  0.356  0.293 |
| Figure 2B | Ctrl-0h  Ctrl-24h  Ctrl-48h  Ctrl-72h  Smurf1-0h  Smurf1-24h  Smurf1-48h  Smurf1-72h | Shapiro-Wilk test  Shapiro-Wilk test  Shapiro-Wilk test  Shapiro-Wilk test Shapiro-Wilk test  Shapiro-Wilk test Shapiro-Wilk test  Shapiro-Wilk test | 0.990  0.917  0.968  0.955  0.838  0.951  0.990  0.909 | 0.812  0.441  0.654  0.593  0.209  0.572  0.806  0.414 |
| Figure 2D | Ctrl  Smurf1 | Shapiro-Wilk test  Shapiro-Wilk test | 0.914  0.867 | 0.493  0.254 |
| Figure 2F | Ctrl  Smurf1 | Shapiro-Wilk test  Shapiro-Wilk test | 0.985  0.942 | 0.960  0.680 |
| Figure 3B | Ctrl-7d  Ctrl-14d  Ctrl-21d  Ctrl-35d  Smurf1-7d  Smurf1-14d  Smurf1-21d  Smurf1-35d | Shapiro-Wilk test  Shapiro-Wilk test  Shapiro-Wilk test  Shapiro-Wilk test Shapiro-Wilk test  Shapiro-Wilk test Shapiro-Wilk test  Shapiro-Wilk test | 0.853  0.776  0.857  0.956  0.861  0.871  0.928  0.982 | 0.235  0.066  0.250  0.751  0.265  0.301  0.585  0.914 |
| Figure 3D | Ctrl  Smurf1 | Shapiro-Wilk test  Shapiro-Wilk test | 0.763  0.974 | 0.039  0.903 |
| Figure 3F | Ctrl  Smurf1 | Shapiro-Wilk test  Shapiro-Wilk test | 0.952  0.999 | 0.754  1.000 |
| Figure 4A | Ctrl-Axin1  Smurf1-Axin1  Ctrl-Axin2  Smurf1-Axin2 | Shapiro-Wilk test Shapiro-Wilk test Shapiro-Wilk test Shapiro-Wilk test | 0.997  0.898  0.991  0.937 | 0.892  0.379  0.817  0.516 |
| Figure 4E | Ctrl-0h  Ctrl-2h  Ctrl-4h  Ctrl-8h  Smurf1-0h  Smurf1-2h  Smurf1-4h  Smurf1-8h | Shapiro-Wilk test Shapiro-Wilk test Shapiro-Wilk test  Shapiro-Wilk test  Shapiro-Wilk test Shapiro-Wilk test  Shapiro-Wilk test  Shapiro-Wilk test | 0.937  0.820  0.802  0.934  0.864  0.971  0.874  0.889 | 0.515  0.162  0.118  0.505  0.278  0.673  0.306  0.350 |
| Figure 5A | Ctrl  Smurf1 | Shapiro-Wilk test Shapiro-Wilk test | 0.966  0.974 | 0.848  0.900 |
| Figure 5D-  cytoplasmic | Ctrl  Smurf1 | Shapiro-Wilk test Shapiro-Wilk test | 0.948  0.912 | 0.704  0.492 |
| Figure 5D-  nuclear | Ctrl  Smurf1 | Shapiro-Wilk test Shapiro-Wilk test | 0.919  0.920 | 0.492  0.535 |
| Figure 6A | Ctrl-0h  Ctrl-24h  Ctrl-48h  Ctrl-72h  Smurf1-0h  Smurf1-24h  Smurf1-48h  Smurf1-72h  Smurf1+IWR-1-0h  Smurf1+IWR-1-24h  Smurf1+IWR-1-48h  Smurf1+IWR-1-72h | Shapiro-Wilk test Shapiro-Wilk test  Shapiro-Wilk test Shapiro-Wilk test  Shapiro-Wilk test Shapiro-Wilk test  Shapiro-Wilk test Shapiro-Wilk test  Shapiro-Wilk test Shapiro-Wilk test  Shapiro-Wilk test Shapiro-Wilk test | 0.864  0.936  0.957  0.997  0.999  0.982  0.953  0.929  0.872  0.855  0.906  0.982 | 0.279  0.512  0.599  0.898  0.935  0.743  0.581  0.482  0.302  0.253  0.405  0.741 |
| Figure 6B | Ctrl  Smurf1  Smurf1+IWR-1 | Shapiro-Wilk test  Shapiro-Wilk test  Shapiro-Wilk test | 0.939  0.974  0.923 | 0.661  0.902  0.383 |
